# Supplementary material for: Role of the co-catalyst in the asymmetric coupling of racemic epoxides with CO2 using multichiral Co(iii) complexes: product selectivity and enantioselectivity
Source: Royal Society of Chemistry journal article supplement (doi:10.1039/c2sc20068f), 2012-01-01
Supplement: c2sc20068f.pdf [file c2sc20068f.pdf]

---

## SUPPORTING INFORMATION

for

# Role of the Cocatalyst in the Asymmetric Coupling of Racemic Epoxides with CO<sub>2</sub> using Multichiral Co(III) Complexes: Product Selectivity and Enantioselectivity

*Wei-Min Ren, Guang-Peng Wu, Chuang Liu, Fei Lin, Yi Luo, Jing-Yang Jiang, and Xiao-Bing Lu\**

State Key Laboratory of Fine Chemicals, College of Chemistry, Dalian University of Technology, 2

linggong road, 116024 Dalian, China

E-mail: [lxb-1999@163.com](mailto:lxb-1999@163.com)

### Contents

|                                                                                                                                       |     |
|---------------------------------------------------------------------------------------------------------------------------------------|-----|
| 1. General information.....                                                                                                           | S2  |
| 2. Synthesis of ligand .....                                                                                                          | S2  |
| 3. Enantiomeric excess of propylene carbonate at multiple conversions.....                                                            | S4  |
| 4. Effect of the molar ratio of propylene oxide to ( <i>R,R,R</i> )- <b>1a</b> on the product selectivity and enantioselectivity..... | S5  |
| 5. Catalyst Recycling Experiments.....                                                                                                | S6  |
| 6. The coordination of <sup>n</sup> Bu <sub>4</sub> NN <sub>3</sub> to ( <i>R,R,R</i> )- <b>1b</b> studied by FTIR spectroscopy.....  | S7  |
| 7. The weak coordination of MTBD to ( <i>R,R,R</i> )- <b>1b</b> studied by UV-Vis spectroscopy .....                                  | S7  |
| 8. Monitoring the selectivity of cyclic/polymeric products by <i>in situ</i> infrared spectroscopy.....                               | S8  |
| 9. <sup>1</sup> H NMR and <sup>13</sup> C NMR spectra of the ligand .....                                                             | S9  |
| 10. <sup>1</sup> H NMR and <sup>13</sup> C NMR spectra of the complex ( <i>R,R,R</i> )- <b>1a</b> .....                               | S10 |
| 11. Determination of enantiomeric purity of various substrates or products .....                                                      | S11 |

## 1. General information

All manipulations involving air- and/or water-sensitive compounds were carried out in glove box or under dry nitrogen using standard Schlenk techniques. Propylene oxide (PO) was refluxed over a mixture of KOH/CaH<sub>2</sub>, and fractionally distilled under a nitrogen atmosphere prior to use. Other epoxides were purchased from Acros company and distilled under a nitrogen atmosphere from CaH<sub>2</sub> prior to use. Carbon dioxide (99.995%) was purchased from Dalian Institute of Special Gases and used as received.

<sup>1</sup>H and <sup>13</sup>C NMR spectra were recorded on a Varian INOVA-400 MHz type (<sup>1</sup>H, 400 MHz; <sup>13</sup>C, 100 MHz) spectrometer. Their peak frequencies were referenced versus an internal standard (TMS) shifts at 0 ppm for <sup>1</sup>H NMR and against the solvent, chloroform-*d* at 77.0 ppm for <sup>13</sup>C NMR, respectively.

ESI/MS spectra of the complex and ligand in positive ion mode were carried out using a Micromass Q-ToF (Micromass, Wythenshawe, UK) mass spectrometer equipped with an orthogonal electrospray source (Z-spray) and referenced against the sample of (m/z)<sup>+</sup> = 574.3182 (Capillary = 2000 V, Sample cone = 20 V).

## 2. Synthesis of ligand

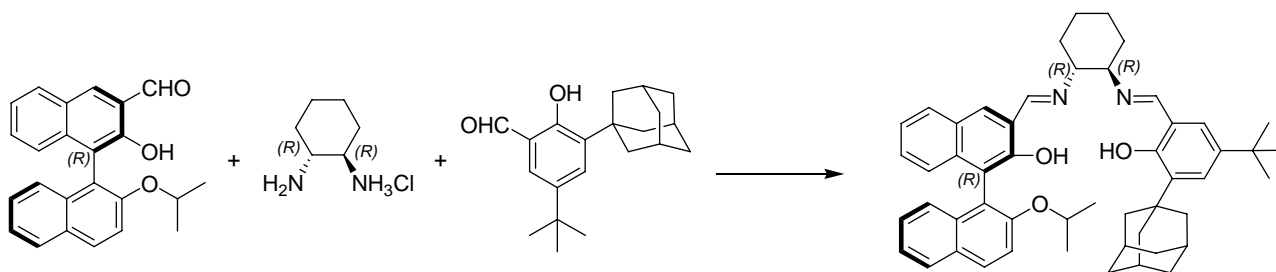

A flask was charged with (*R,R*)-1,2-diaminocyclohexane mono(hydrogen chloride) (0.15 g, 1.0 mmol), activated 5 Å molecular sieve (1.00 g), and anhydrous methanol (10 mL). 3-adamanyl-5-*tert*-butyl-2-hydroxybenzaldehyde (0.31 g, 1.0 mmol) was added in one portion and the reaction mixture was stirred at room temperature for 1 h. A solution of 3-formyl-2-hydroxy-2'-isopropoxy-1,1'-binaphthyl (0.36 g, 1.0 mmol) in anhydrous methylene chloride (10 mL) was then added to the reaction system, followed by the slow addition of triethylamine (0.14 mL, 1.0 mmol). After the reaction mixture was stirred at room temperature for an additional 4 h, all solvents and the excessive triethylamine were removed in *vacuo*. The residue was purified by column chromatography on silica gel using petrol ether/ethyl acetate (10:1) as the mobile phase to give the ligand as a bright yellow solid (0.48 g, 65%). [ $\alpha$ ]<sub>D</sub><sup>20</sup> -193 (*c* 1.0, CHCl<sub>3</sub>).

---

<sup>1</sup>H NMR (400 MHz, CDCl<sub>3</sub>): 13.77 (s, 1H), 13.00 (s, 1H), 8.54 (s, 1H), 8.18 (s, 1H), 7.90 (d, *J* = 8.0 Hz, 1H), 7.83 (d, *J* = 8.0 Hz, 1H), 7.73–7.78 (m, 2H), 7.41 (t, *J* = 8.0 Hz, 1H), 7.05–7.29 (m, 7H), 6.87 (s, 1H), 4.33–4.39 (m, 1H), 3.36–3.41 (m, 1H), 3.20–3.25 (m, 1H), 2.19 (s, 6H), 2.09 (s, 3H), 1.50–2.04 (m, 14H), 1.18 (s, 9H), 1.01 (d, *J* = 6.0 Hz, 3H), 0.93 (d, *J* = 6.0 Hz, 3H). <sup>13</sup>C NMR (100 MHz, CDCl<sub>3</sub>): δ 166.1, 165.3, 158.3, 154.6, 154.1, 140.1, 136.8, 135.4, 134.1, 133.3, 129.8, 129.4, 128.6, 128.6, 128.1, 127.8, 127.3, 126.9, 126.4, 125.9, 125.6, 125.2, 123.8, 123.0, 121.7, 120.7, 118.7, 117.8, 117.5, 73.3, 72.8, 71.8, 40.4, 37.3, 34.2, 33.2, 32.9, 31.5, 29.5, 24.4, 24.3, 22.6, 22.5. HRMS (*m/z*) Calcd. for [C<sub>51</sub>H<sub>59</sub>N<sub>2</sub>O<sub>3</sub>]<sup>+</sup>: 747.4526, found: 747.4573.

### 3. Enantiomeric excess of propylene carbonate at multiple conversions

**Table S1** Enantioselective Coupling of Propylene Oxide with CO<sub>2</sub> at various reaction time points<sup>a</sup>

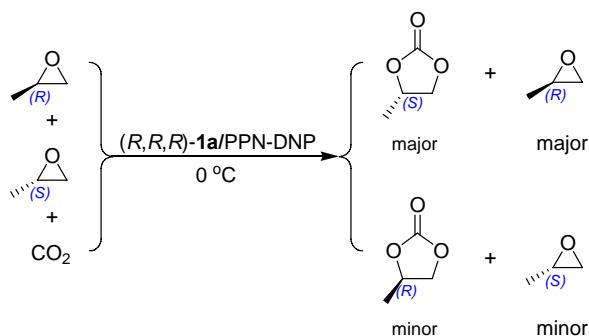

| Entry | Time (h) | Conversion (%) | PC <i>ee</i> (%) <sup>b</sup> | <i>k</i> <sub>rel</sub> <sup>c</sup> |
|-------|----------|----------------|-------------------------------|--------------------------------------|
| 1     | 5        | 15             | 94.5                          | 41.6                                 |
| 2     | 9        | 26             | 93.4                          | 40.2                                 |
| 3     | 12       | 35             | 91.8                          | 40.6                                 |
| 4     | 18       | 47             | 88.2                          | 38.4                                 |

<sup>a</sup> The reaction was performed in neat *racemic* propylene oxide (7.0 mL, 100 mmol), CO<sub>2</sub> (0.5~0.6 equiv) catalyzed by complex (R,R,R)-1a and PPN-DNP under 0 °C in a 75 mL autoclave. The molar ratio of epoxide to (R,R,R)-1a is 2000/1, and the molar ratio of PPN-DNP to (R,R,R)-1a is 200/1. Selectivity for cyclic carbonate in all systems is 100% based on <sup>1</sup>H NMR spectroscopy of the crude product. <sup>b</sup> *ee* is the enantiomeric excess of the propylene carbonate and determined by chiral GC. <sup>c</sup> *k*<sub>rel</sub> = ln[(1 - *c*)(1 - *ee*)]/ln[(1 - *c*)(1 + *ee*)], where *c* is the conversion and *ee* is the enantiomeric excess of the recovered epoxide.

#### 4. Effect of the molar ratio of propylene oxide to (*R,R,R*)-**1a** on the product selectivity and enantioselectivity

**Table S2** Enantioselective Coupling of *Racemic* Propylene Oxide with CO<sub>2</sub><sup>a</sup>

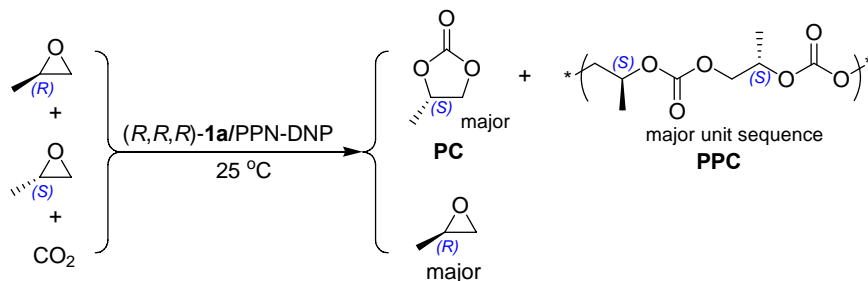

| Entry | [PO]/[ <b>1a</b> ] | Time (h) | Conversion (%) | PC/PPC (%) <sup>b</sup> | PC <i>ee</i> (%) <sup>c</sup> | <i>k</i> <sub>rel</sub> <sup>d</sup> |
|-------|--------------------|----------|----------------|-------------------------|-------------------------------|--------------------------------------|
| 1     | 2000               | 2        | 45             | 91/9                    | 86.2                          | 27.6                                 |
| 2     | 5000               | 4        | 38             | 90/10                   | 88.1                          | 27.1                                 |
| 3     | 10000              | 12       | 46             | 93/7                    | 86.0                          | 29.1                                 |
| 4     | 20000              | 24       | 42             | 98/2                    | 88.5                          | 31.6                                 |

<sup>a</sup> The reaction was performed in neat *racemic* propylene oxide (7.0 mL, 100 mmol), CO<sub>2</sub> (0.5~0.6 equiv) catalyzed by complex (*R,R,R*)-**1a** and PPN-DNP under 25 °C in a 75 mL autoclave. The molar ratio of PPN-DNP to (*R,R,R*)-**1a** is 200/1. <sup>b</sup> Selectivity for cyclic carbonate over the polycarbonate in all systems is determined by <sup>1</sup>H NMR spectroscopy of the crude product. <sup>c</sup> *ee* is the enantiomeric excess of the propylene carbonate and determined by chiral GC. <sup>d</sup>  $k_{rel} = \ln[(1 - c)(1 - ee)]/\ln[(1 - c)(1 + ee)]$ , where *c* is the conversion and *ee* is the enantiomeric excess of the recovered epoxide.

## 5. Catalyst Recycling Experiments

**Table S3** Enantioselective Coupling of *Racemic* Propylene Oxide with Carbon Dioxide Using Recovered Binary System of (*R,R,R*)-**1a** and PPN-DNP<sup>a</sup>

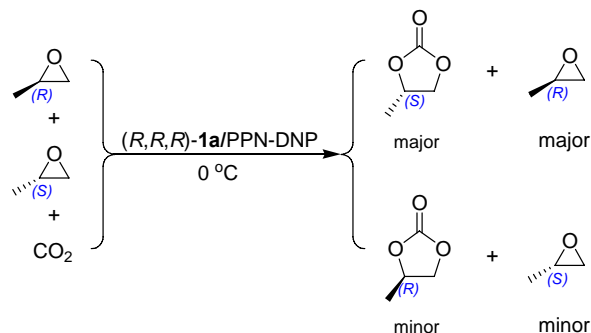

| Entry             | Time (h) | Conversion (%) | PC <i>ee</i> (%) <sup>c</sup> | <i>k</i> <sub>rel</sub> <sup>d</sup> |
|-------------------|----------|----------------|-------------------------------|--------------------------------------|
| 1 st              | 12       | 35             | 91.8                          | 40.6                                 |
| 2 nd <sup>b</sup> | 12       | 33             | 92.5                          | 40.3                                 |
| 3 rd <sup>b</sup> | 12       | 30             | 93.1                          | 41.4                                 |
| 4 th <sup>b</sup> | 15       | 34             | 92.1                          | 38.9                                 |

<sup>a</sup> The reaction was performed in neat *racemic* propylene oxide (7.0 mL, 100 mmol), CO<sub>2</sub> (0.5~0.6 equiv) catalyzed by complex (*R,R,R*)-**1a** and PPN-DNP under 0 °C in a 75 mL autoclave. The molar ratio of epoxide to (*R,R,R*)-**1a** is 2000/1, and the molar ratio of PPN-DNP to (*R,R,R*)-**1a** is 200/1. Selectivity for cyclic carbonate in all systems is 100% based on <sup>1</sup>H NMR spectroscopy of the crude product. <sup>b</sup> The binary system of (*R,R,R*)-**1a** and PPN-DNP was recovered by distillation of reaction mixture under reduced pressure. <sup>c</sup> *ee* is the enantiomeric excess of the propylene carbonate and determined by chiral GC. <sup>d</sup>  $k_{rel} = \ln[(1 - c)(1 - ee)] / \ln[(1 - c)(1 + ee)]$ , where *c* is the conversion and *ee* is the enantiomeric excess of the recovered epoxide.

## 6. Studying the coordination of complex $n\text{Bu}_4\text{NN}_3$ to $(R,R,R)\text{-1b}$ by FTIR spectroscopy

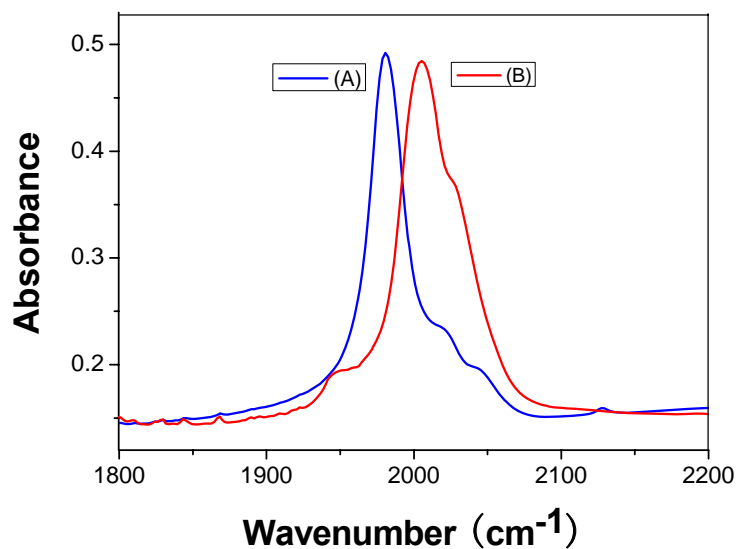

**Figure S1.** Infrared spectra of  $\text{CH}_2\text{Cl}_2$  solutions of (A) cobalt salen azide complex, (B) the complex **1b** in the presence of 2 equiv of  $n\text{Bu}_4\text{NN}_3$ .

## 7. Studying the weak coordination of MTBD to $(R,R,R)\text{-1b}$ by UV-Vis spectroscopy

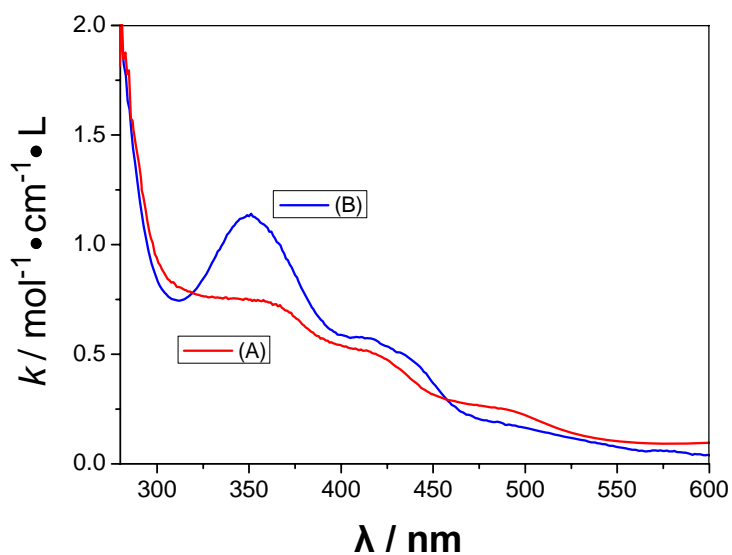

**Figure S2.** Ultraviolet spectra of  $\text{CH}_2\text{Cl}_2$  solutions of (A) the complex **1b**, (B) after addition of 2 equiv of MTBD.

## 8. Monitoring the selectivity of cyclic/polymeric products by *in situ* infrared spectroscopy

To a stirred mixture of complex **2** (21.3 mg, 0.025 mmol, 1 equiv.) and appropriate  $n\text{Bu}_4\text{N-DNP}$  or  $n\text{Bu}_4\text{NCl}$  were dissolved in propylene oxide (3.5 mL, 50 mmol, 2000 equiv.) to form red-brown solution in a nitrogen atmosphere. The mixture solution was charged into a pre-dried 75 mL autoclave equipped with a sampling valve under a  $\text{CO}_2$  atmosphere. The autoclave was pressurized to  $\text{CO}_2$  (2.0 MPa). Then, the reaction mixture was transfer into the infrared cell (25  $\mu\text{m}$  thickness) with 2.0 MPa  $\text{CO}_2$ . Typical data obtained for the formation of cyclic carbonates and polycarbonates as monitored in the  $\text{C}=\text{O}$  region by infrared spectroscopy every 2 min.

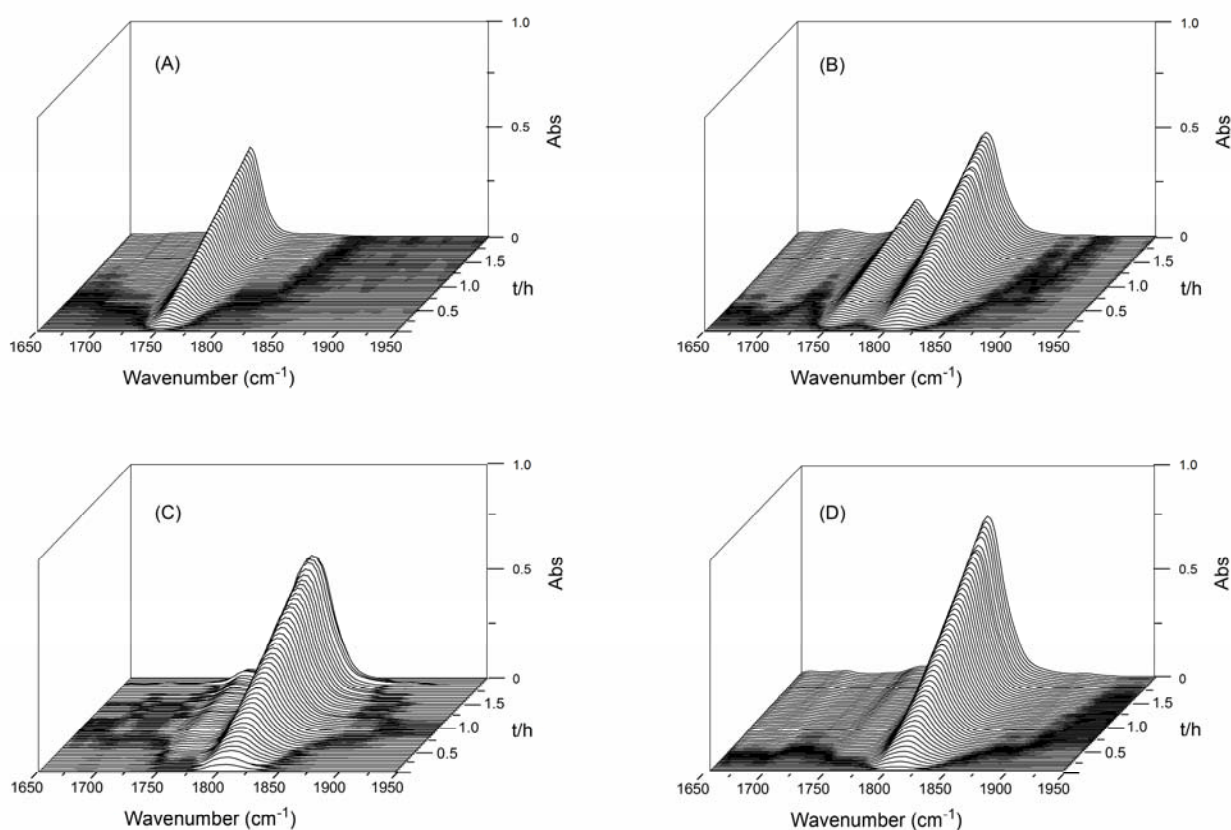

**Figure S3** In situ infrared monitoring of the coupling of PO with  $\text{CO}_2$  catalyzed by complex **2** and  $n\text{Bu}_4\text{NCl}$ . The molar ratio of **2** to  $n\text{Bu}_4\text{NCl}$  is (A) 1:1; (B) 1:5; (C) 1:10 and (D) 1:20.



## 9. $^1\text{H}$ NMR and $^{13}\text{C}$ NMR spectra of the ligand

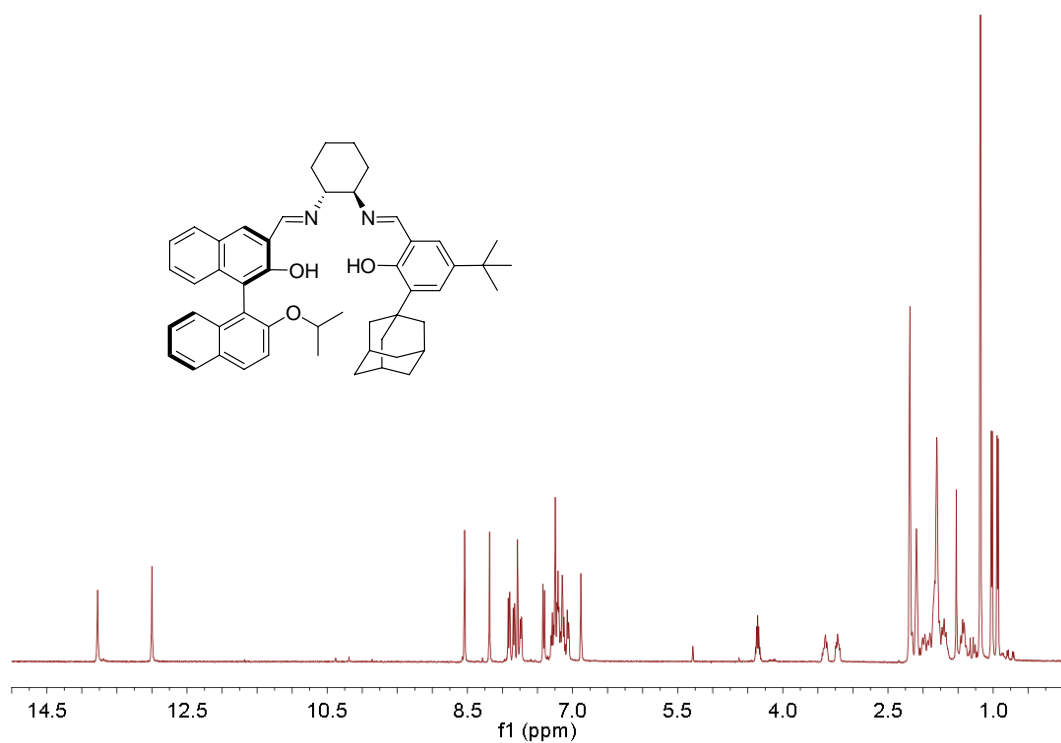

**Figure S4.**  $^1\text{H}$  NMR spectrum of the ligand

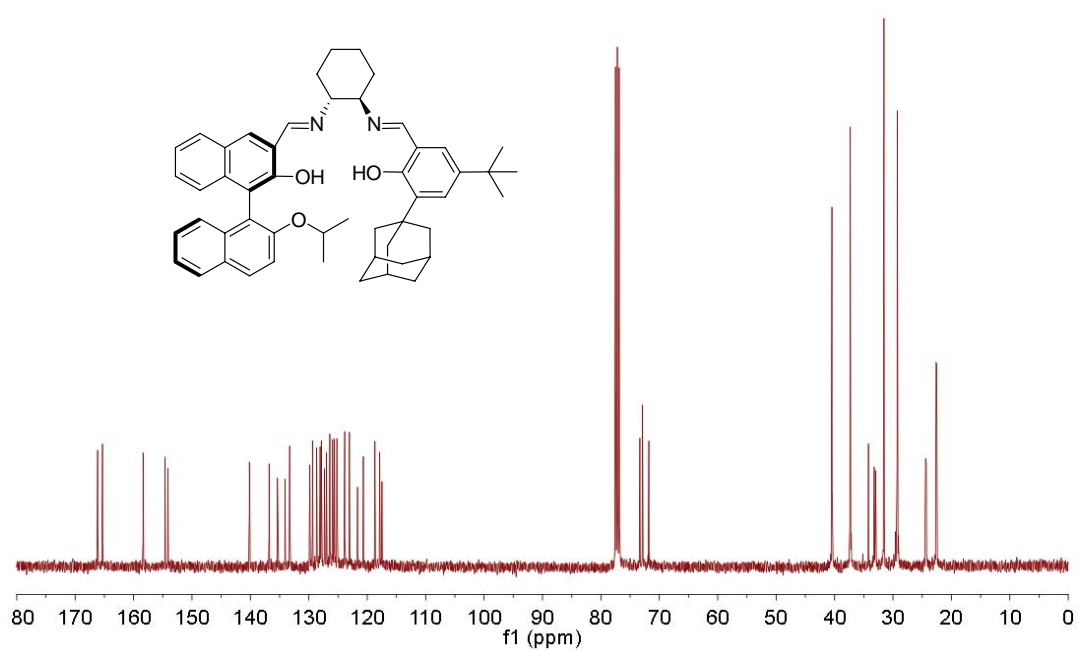

**Figure S5.**  $^{13}\text{C}$  NMR spectrum of the ligand

## 10. $^1\text{H}$ NMR and $^{13}\text{C}$ NMR spectra of the complex (*R,R,R*)-1a

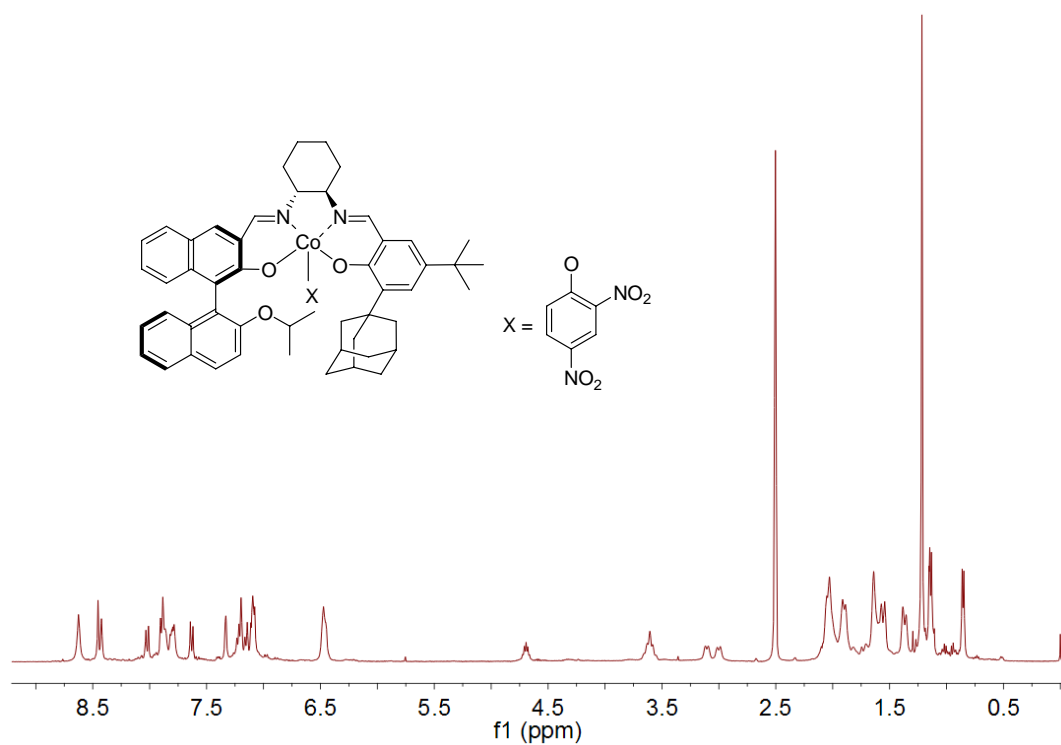

**Figure S6.**  $^1\text{H}$  NMR spectrum of the complex (*R,R,R*)-1a

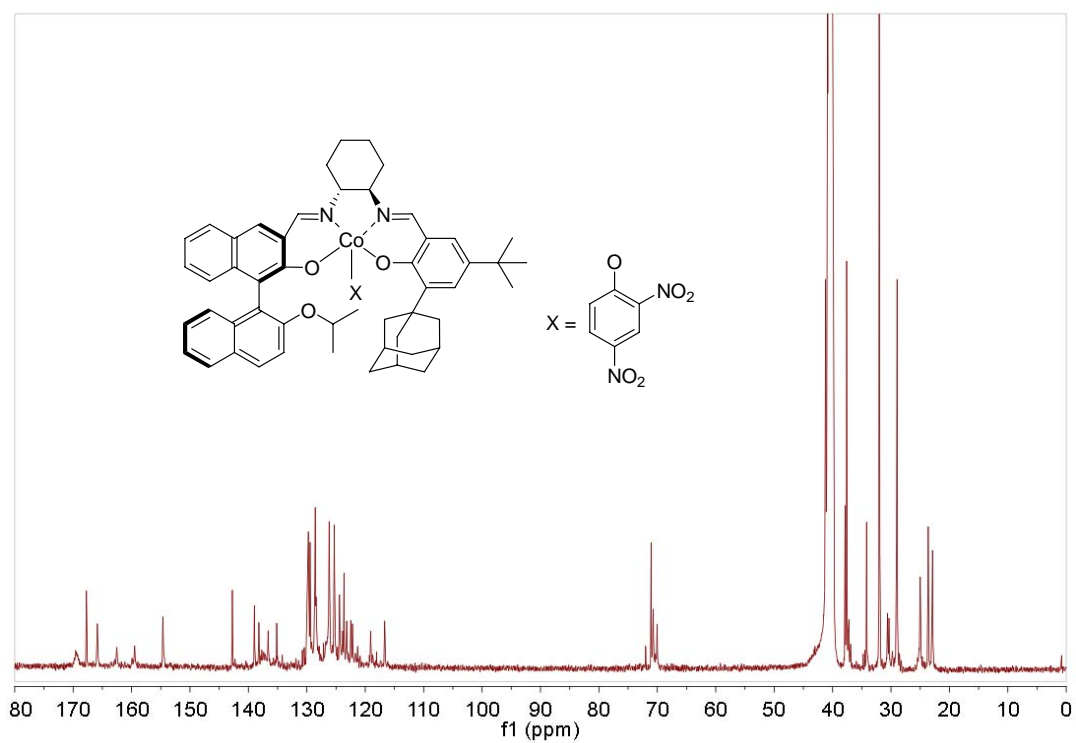

**Figure S7.**  $^{13}\text{C}$  NMR spectrum of the complex (*R,R,R*)-1a

### ***11. Determination of enantiomeric purity of various substrates or products.***

Enantiomeric excesses (ee's) were determined by capillary GC analysis using an Agilent 6890 Series II Gas Chromatograph with N<sub>2</sub> as a carrier gas or by chiral HPLC analysis using an Agilent 1150 HPLC. The following GC columns were employed: 2,6-dibutyl-3-butyryl-β-Cyclodex-B (30 m x 0.25 mm id x 0.25 μm film; Advanced Separation Technologies, Inc.) set at a column head pressure of 13 psi, Cyclodex-B (30 m x 0.25 mm id x 0.25 μm film; J&W Scientific) set at a column head pressure of 10 psi. The following HPLC columns were employed: Chiracel OD-H (Daicel Inc., 25 cm x 0.46 cm i.d.), Whelk-O 1 (Regis Technologies Inc., 25 cm x 0.46 cm i.d.).

**(S)-propylene carbonate:** The ee of the resulting propylene oxide was determined to be 97.1% by chiral GC analysis (2,6-dibutyl-3-butyryl- $\beta$ -Cyclodex-B, 160 °C, isothermal,  $t_R$ (minor) = 7.97 min,  $t_R$ (major) = 8.07 min).

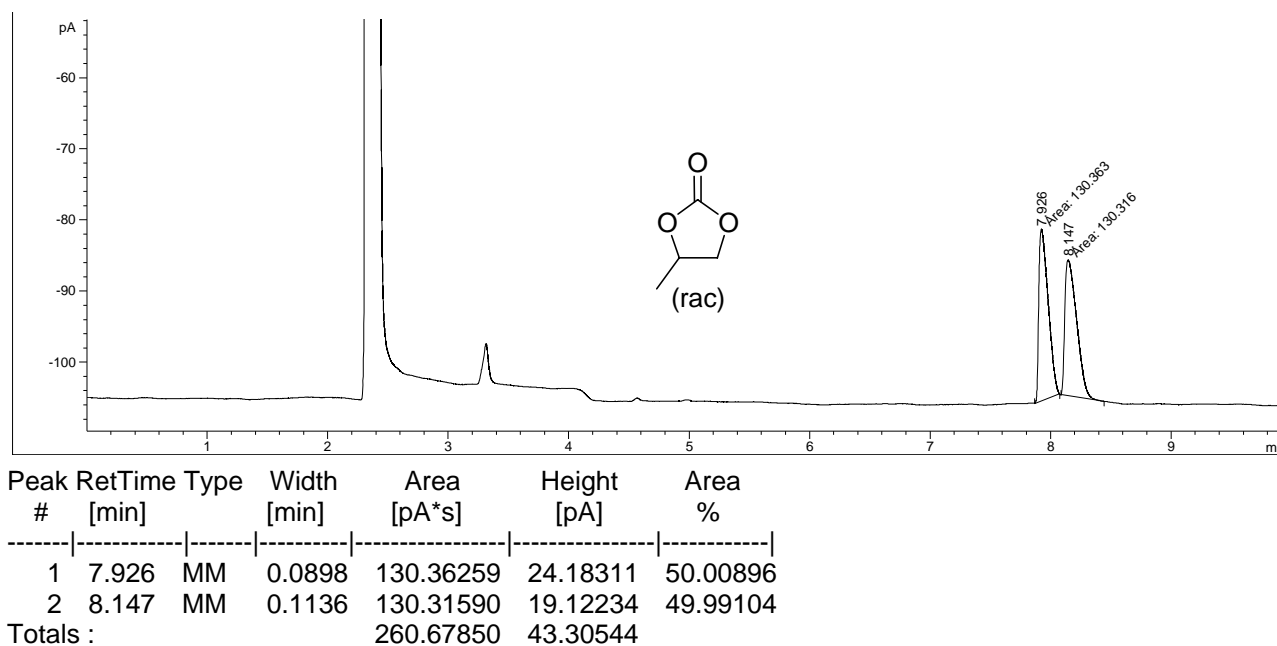

**Figure S8.** The chiral GC analysis of racemic propylene carbonate

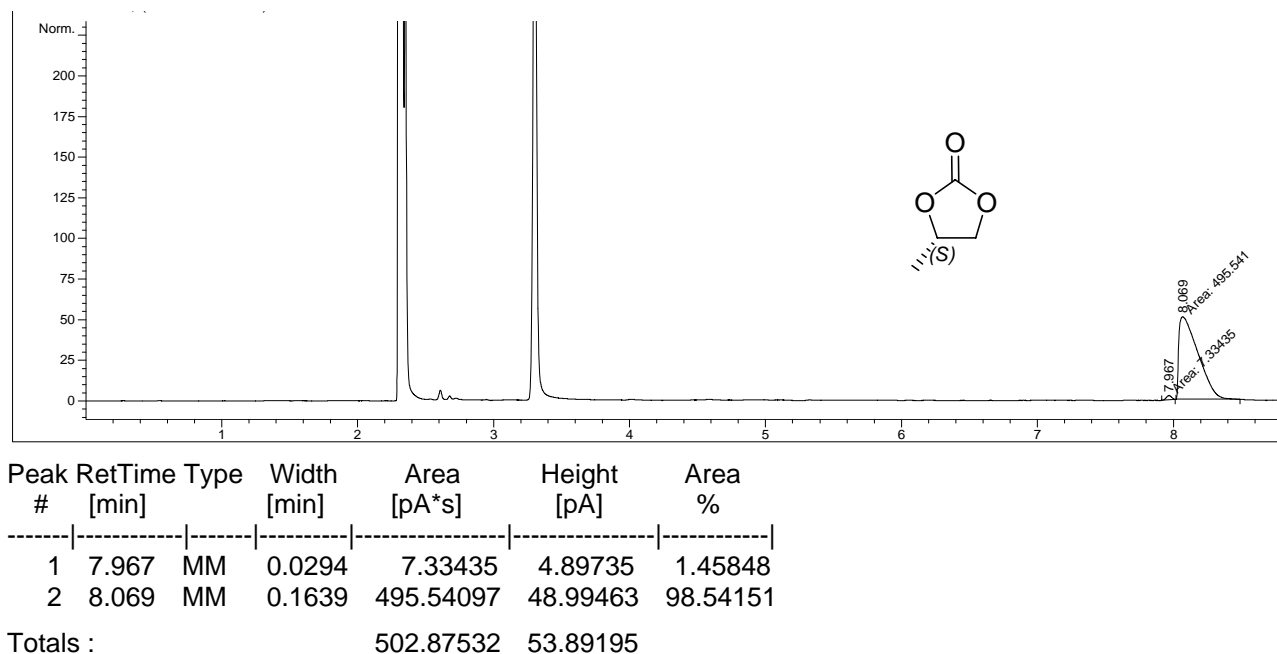

**Figure S9.** The chiral GC analysis of (S)-configuration-enriched propylene carbonate

**(S)-1,2-butylene carbonate:** The ee of the resulting 1,2-butylene oxide was determined to be 88.5% by chiral GC analysis (2,6-dibutyl-3-butyryl- $\beta$ -Cyclodex-B, 160 °C, isothermal,  $t_R$ (minor) = 9.75 min,  $t_R$ (major) = 9.90 min).

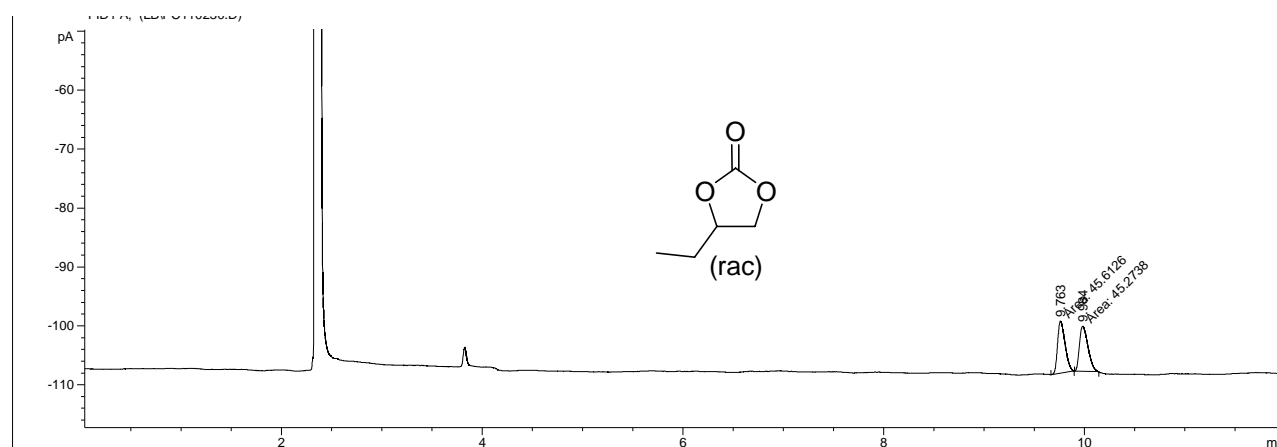

| Peak #   | RetTime [min] | Type | Width [min] | Area [pA*s] | Height [pA] | Area %   |
|----------|---------------|------|-------------|-------------|-------------|----------|
| 1        | 9.736         | MM   | 0.0870      | 45.61259    | 8.86383     | 50.18638 |
| 2        | 9.984         | MM   | 0.0970      | 45.27380    | 7.69940     | 49.81362 |
| Totals : |               |      |             | 90.88639    | 16.56323    |          |

**Figure S10.** The chiral GC analysis of racemic 1,2-butylene carbonate

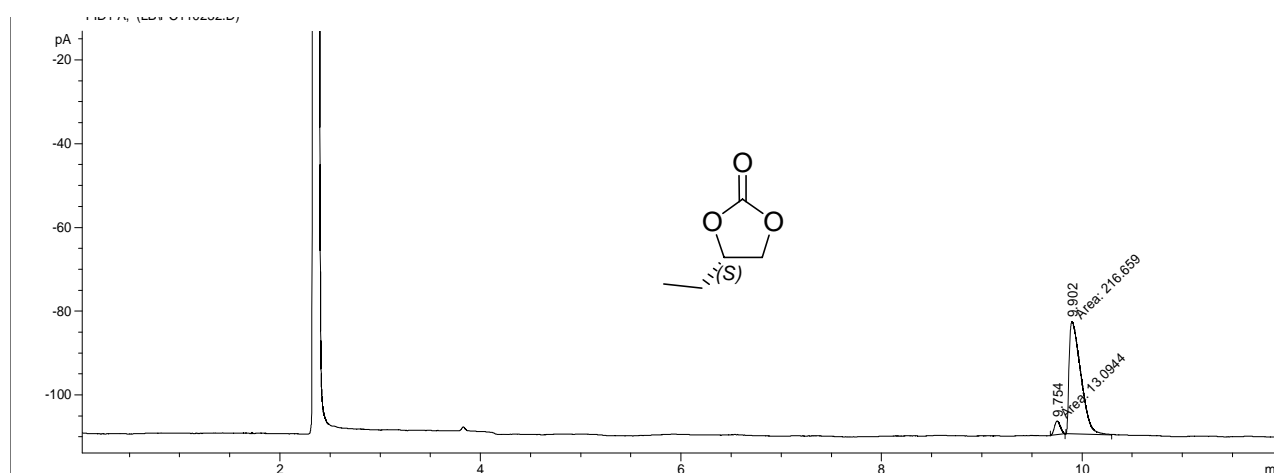

| Peak #   | RetTime [min] | Type | Width [min] | Area [pA*s] | Height [pA] | Area %   |
|----------|---------------|------|-------------|-------------|-------------|----------|
| 1        | 9.754         | MM   | 0.0704      | 13.09441    | 3.41533     | 5.74379  |
| 2        | 9.902         | MM   | 0.1311      | 216.65883   | 26.67322    | 94.25621 |
| Totals : |               |      |             | 229.75324   | 30.08853    |          |

**Figure S11.** The chiral GC analysis of (S)-configuration-enriched 1,2-butylene carbonate

**(S)-4-(chloromethyl)-1,3-dioxolan-2-one:** The ee of the resulting 4-(chloromethyl)-1,3-dioxolan-2-one was determined to be 77.3% by chiral GC analysis of the diol derivative form hydrolysis with 1M NaOH (Cyclodex-B, 80 °C, isothermal,  $t_R(\text{minor}) = 5.54$  min,  $t_R(\text{major}) = 5.84$  min).

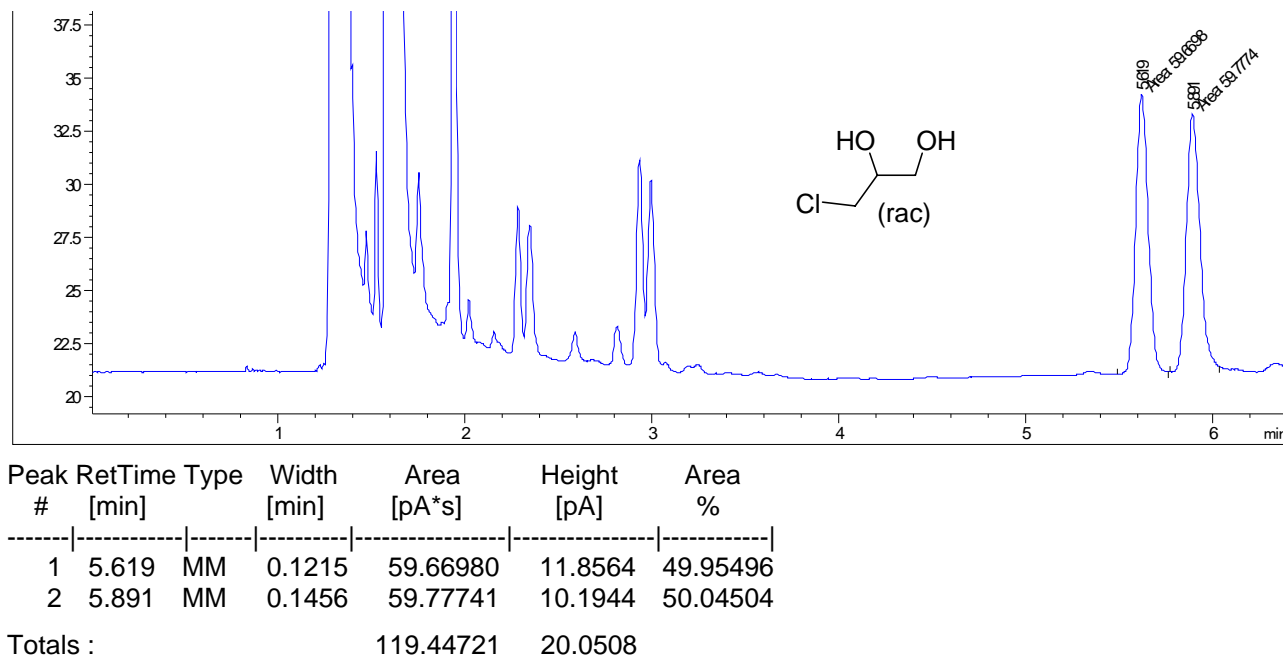

**Figure S12.** The chiral GC analysis of racemic 3-chloropropane-1,2-diol

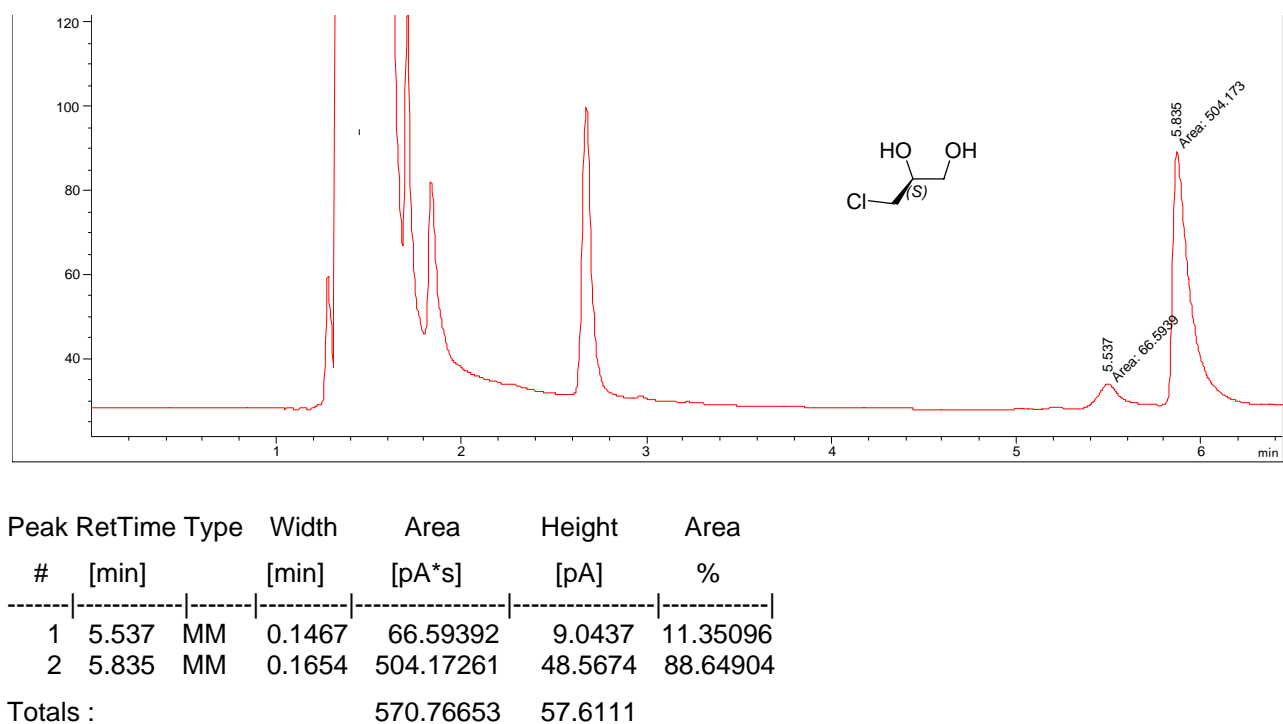

**Figure S13.** The chiral GC analysis of (S)-configuration-enriched 3-chloropropane-1,2-diol

**(S)-4-(phenoxyethyl)-1,3-dioxolan-2-one:** The ee of the resulting 4-(chloromethyl)-1,3-dioxolan-2-one was determined to be 72.4% by chiral HPLC analysis of the diol derivative from hydrolysis with 1 M NaOH (OD-H, 8:2 hexane:*i*-PrOH,  $t_R(\text{major}) = 7.42$  min,  $t_R(\text{minor}) = 13.84$  min).

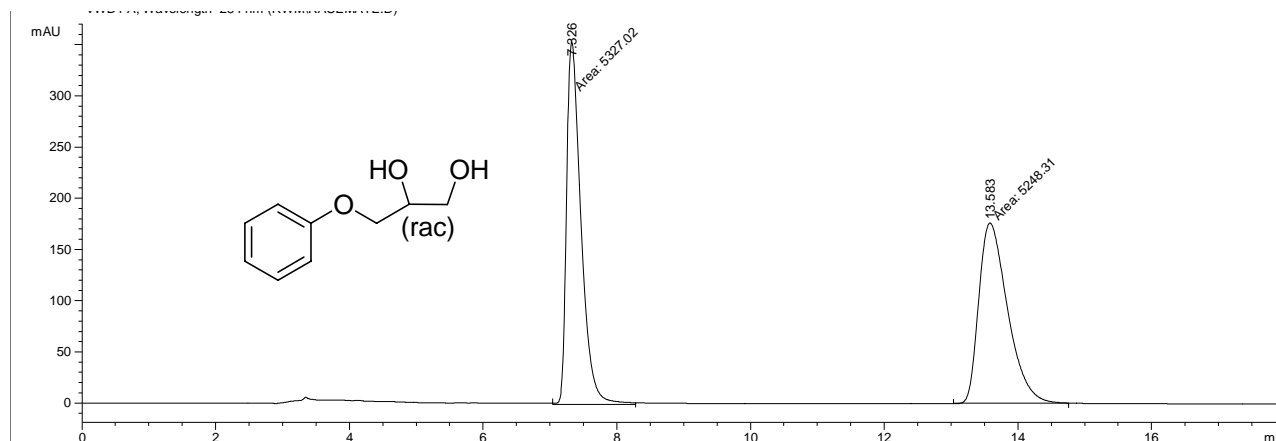

| Peak #   | RetTime [min] | Type | Width [min] | Area [pA*s] | Height [pA] | Area %   |
|----------|---------------|------|-------------|-------------|-------------|----------|
| 1        | 7.326         | BB   | 0.2253      | 5327.02078  | 353.21173   | 50.62725 |
| 2        | 13.583        | BB   | 0.4603      | 5248.31016  | 176.46399   | 49.37274 |
| Totals : |               |      |             | 1.05220e4   | 529.67572   |          |

**Figure S14.** The chiral HPLC analysis of racemic 3-phenoxypropane-1,2-diol

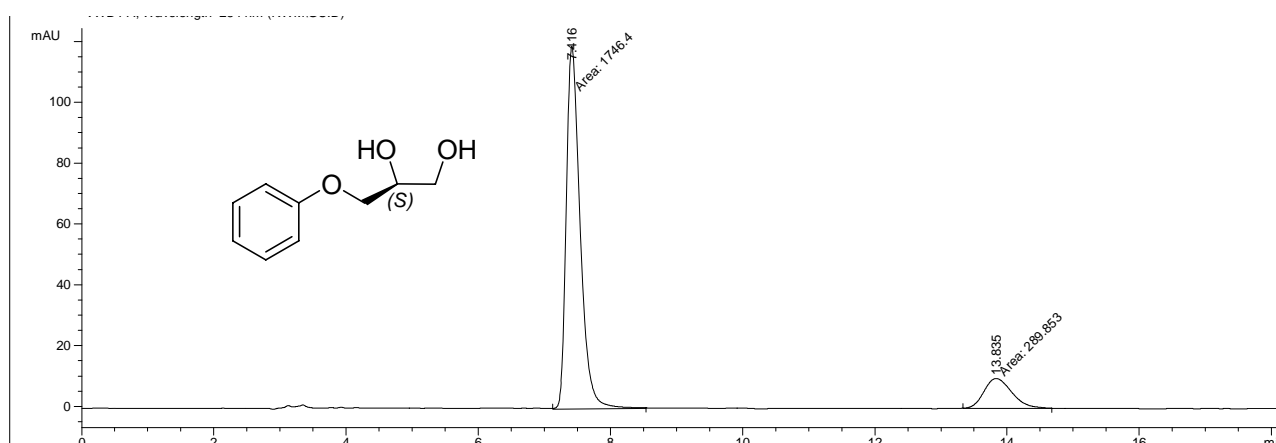

| Peak #   | RetTime [min] | Type | Width [min] | Area [pA*s] | Height [pA] | Area %   |
|----------|---------------|------|-------------|-------------|-------------|----------|
| 1        | 7.416         | PB   | 0.2208      | 1746.40681  | 118.97120   | 86.18541 |
| 2        | 13.835        | BB   | 0.4531      | 289.85336   | 9.85969     | 13.81459 |
| Totals : |               |      |             | 2036.26017  | 128.83089   |          |

**Figure S15.** The chiral HPLC analysis of (*S*)-configuration-enriched 3-phenoxypropane-1,2-diol

**(S)-4-phenyl-1,3-dioxolan-2-one:** The ee of the resulting 4-phenyl-1,3-dioxolan-2-one was determined to be 71.0% by chiral HPLC analysis of the diol derivative from hydrolysis with 1 M NaOH (OD-H, 9:1 hexane:*i*-PrOH,  $t_R(\text{minor}) = 15.94$  min,  $t_R(\text{minor}) = 17.00$  min) .

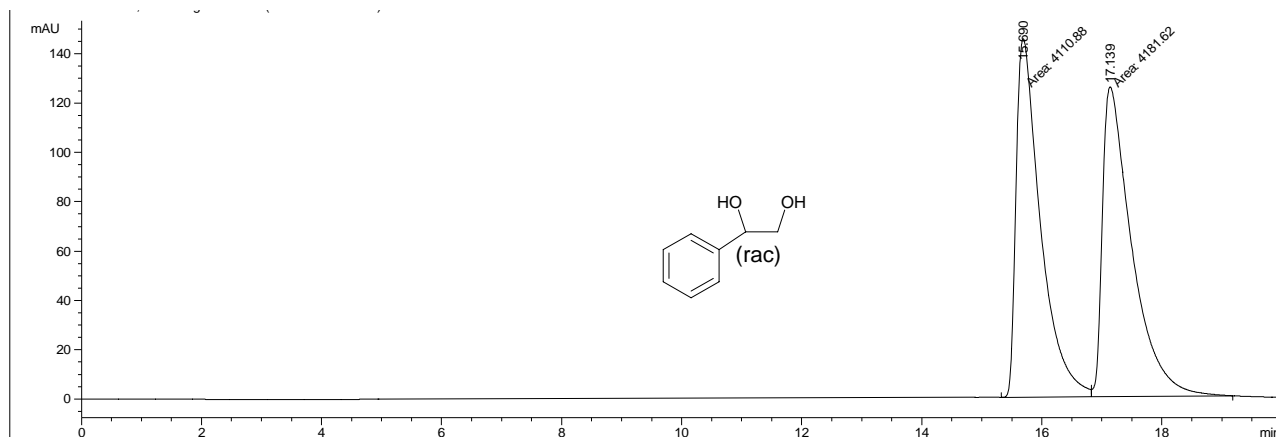

| Peak #   | RetTime [min] | Type | Width [min] | Area [pA*s] | Height [pA] | Area %   |
|----------|---------------|------|-------------|-------------|-------------|----------|
| 1        | 15.690        | VV   | 0.4161      | 4110.88139  | 145.56360   | 49.86585 |
| 2        | 17.139        | VB   | 0.4943      | 4181.62895  | 125.34576   | 50.13415 |
| Totals : |               |      |             | 8292.51034  | 271.90936   |          |

**Figure S16.** The chiral HPLC analysis of racemic 1-phenylethane-1,2-diol

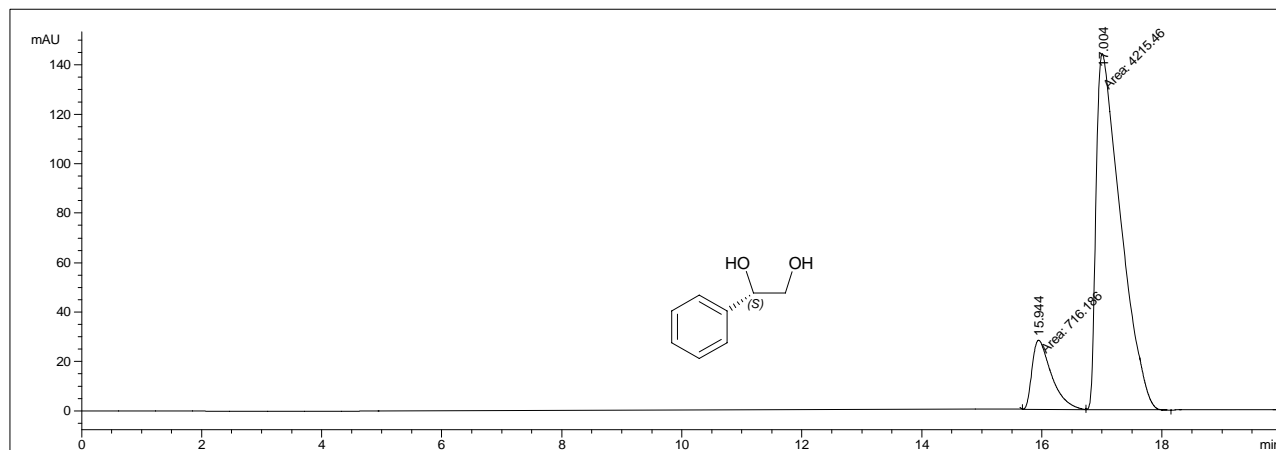

| Peak #   | RetTime [min] | Type | Width [min] | Area [pA*s] | Height [pA] | Area %   |
|----------|---------------|------|-------------|-------------|-------------|----------|
| 1        | 15.944        | VB   | 0.4883      | 716.18672   | 26.33786    | 15.99695 |
| 2        | 17.004        | BB   | 0.5714      | 4215.46921  | 145.78908   | 84.00305 |
| Totals : |               |      |             | 4931.65593  | 172.12694   |          |

**Figure S17.** The chiral HPLC analysis of (*S*)-configuration-enriched 1-phenylethane-1,2-diol



**(R)-Styrene oxide:** The ee of the recovered styrene oxide was determined to be 8.8% by chiral HPLC analysis (Whelk-O 1, 99:1 hexane:*i*-PrOH,  $t_R(\text{minor}) = 9.05$  min,  $t_R(\text{major}) = 11.93$  min) .

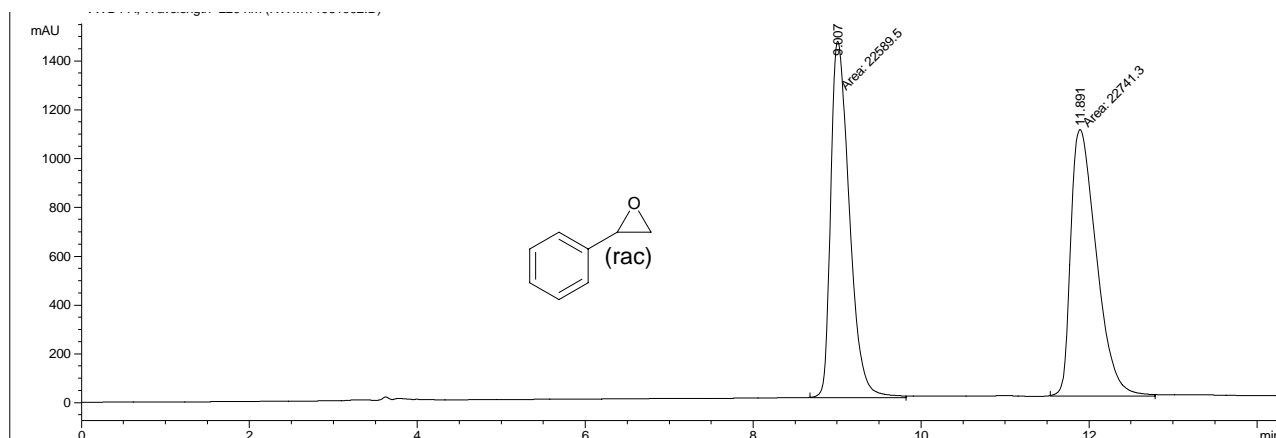

| Peak #   | RetTime [min] | Type | Width [min] | Area [pA*s] | Height [pA] | Area %   |
|----------|---------------|------|-------------|-------------|-------------|----------|
| 1        | 9.007         | PB   | 0.2391      | 2.25895e4   | 1458.71753  | 49.00926 |
| 2        | 11.891        | VB   | 0.3307      | 2.27413e4   | 1092.92480  | 50.99074 |
| Totals : |               |      |             | 4.53308e4   | 2551.64233  |          |

**Figure S18.** The chiral HPLC analysis of racemic styrene oxide

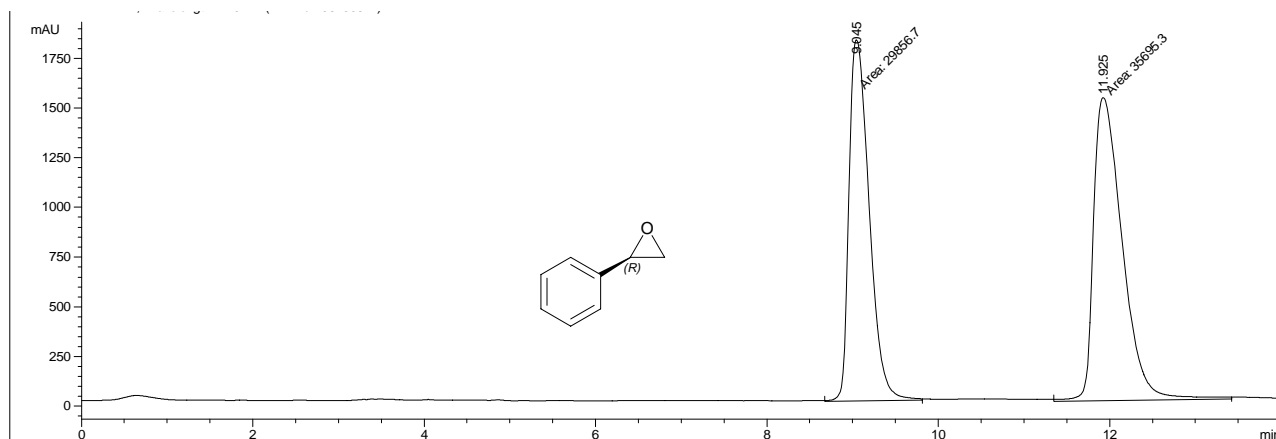

| Peak #   | RetTime [min] | Type | Width [min] | Area [pA*s] | Height [pA] | Area %   |
|----------|---------------|------|-------------|-------------|-------------|----------|
| 1        | 9.045         | VV   | 0.2529      | 2.98567e4   | 1818.27551  | 45.45397 |
| 2        | 11.925        | VB   | 0.3637      | 3.56953e4   | 1525.91260  | 54.54603 |
| Totals : |               |      |             | 6.55520e4   | 2551.64233  |          |

**Figure S19.** The chiral HPLC analysis of (*R*)-configuration-enriched styrene oxide
